# Supplementary material
Source: publisher figshare collection journal article supplement (https://diabetesjournals.figshare.com/articles/dataset/_/27733341)
Supplement: Supplementary file 1 [file 2]

## Supplemental Material

### Links to Excel files:

- **CP.xlsx:**

[https://docs.google.com/spreadsheets/d/16\\_OVioCgUZ-EKKLNu1G9H0iOiJpephQ6/edit?usp=drive\\_link&oid=110612840906643856403&rtpof=true&sd=true](https://docs.google.com/spreadsheets/d/16_OVioCgUZ-EKKLNu1G9H0iOiJpephQ6/edit?usp=drive_link&oid=110612840906643856403&rtpof=true&sd=true)

- **AAD.xlsx**

[https://docs.google.com/spreadsheets/d/1-7xyL82Tk87Z1uRsfKhT0JQDjg3epFTm/edit?usp=drive\\_link&oid=110612840906643856403&rtpof=true&sd=true](https://docs.google.com/spreadsheets/d/1-7xyL82Tk87Z1uRsfKhT0JQDjg3epFTm/edit?usp=drive_link&oid=110612840906643856403&rtpof=true&sd=true)

## Supplementary Tables

**Table S1:** Study descriptions

| Study            | Description                                                                                                                                                                                                                                                                                                                                                                                                                                                                                                                                                                                                                                      |
|------------------|--------------------------------------------------------------------------------------------------------------------------------------------------------------------------------------------------------------------------------------------------------------------------------------------------------------------------------------------------------------------------------------------------------------------------------------------------------------------------------------------------------------------------------------------------------------------------------------------------------------------------------------------------|
| <b>SDRNT1BIO</b> | This is a cohort of people clinically diagnosed with T1D based on AAD, time to insulin, history of ketoacidosis and exclusion of monogenic subtypes of diabetes. Subjects were >16 years at recruitment and comprise one-third of the adult population with T1D in Scotland (1). Random serum C-peptide was measured at the Exeter clinical laboratory (2).                                                                                                                                                                                                                                                                                      |
| <b>DCCT</b>      | Individuals aged 13-39 years with T1D and fasting serum C-peptide $\leq 0.2$ pmol/ml were recruited between 1983 and 1989 in two cohorts. The primary cohort included participants with 1-5 years of diabetes, no pre-existing retinopathy/nephropathy and stimulated C-peptide $\leq 0.5$ pmol/ml. The secondary cohort included participants with 1-15 years of diabetes, pre-existing mild retinopathy and/or nephropathy and stimulated C-peptide $\leq 0.5$ and $\leq 0.2$ pmol/ml for participants with diabetes duration 1-5 and 5-15 years, respectively (3; 4). Stimulated C-peptide measured at baseline was used in current analyses. |
| <b>CACTI</b>     | This is a population-based study of individuals with T1D of duration >10 years at enrolment recruited from Denver, CO, USA, between March 2000 and April 2002 (5). Fasting serum C-peptide was measured during 2014–2016 (6).                                                                                                                                                                                                                                                                                                                                                                                                                    |
| <b>WESDR</b>     | This study included individuals diagnosed with diabetes <32 years of age and treated with insulin who received primary care in an 11-county area in southern Wisconsin 1979-1980 (7). Random serum C-peptide was measured at years 4 and 10 of follow-up (7). The most recent measurement was used.                                                                                                                                                                                                                                                                                                                                              |
| <b>EDC</b>       | This study is only utilized in the AAD analyses. It included individuals with childhood-onset (<17 years of age) T1D who were diagnosed or seen within 1 year of diagnosis (1950–1980) at the Children's Hospital of Pittsburgh(8).                                                                                                                                                                                                                                                                                                                                                                                                              |
| <b>GS</b>        | This is a family-based cohort of 24,000 volunteers across Scotland aged $\geq 18$ years recruited 2006-2011 (9). This cohort was used as the control group and therefore individuals with any record of diabetes in self-report, hospital records or any prescription of insulin or anti-diabetic oral medications were excluded.                                                                                                                                                                                                                                                                                                                |

SDRNT1BIO: Scottish Diabetes Research Network Type 1 Bioresource; DCCT: Diabetes Control and Complications Trial; CACTI: Coronary Artery Calcification in Type 1 Diabetes; WESDR: Wisconsin Epidemiologic Study of Diabetic Retinopathy; EDC: Pittsburgh Epidemiology of Diabetes Complications study; GS: Generation Scotland

**Table S2:** Subject characteristics

| <b>Study</b>                           | <b>SDRNT1BIO<br/>N = 5,349</b> | <b>DCCT<br/>N = 1,304</b> | <b>CACTI<br/>N = 529</b> | <b>WESDR<br/>N = 591</b> | <b>EDC<br/>N = 150</b> |
|----------------------------------------|--------------------------------|---------------------------|--------------------------|--------------------------|------------------------|
| <b>Sex (Male)</b>                      | 3021 (56.5%)                   | 695 (53.3%)               | 235 (44.4)               | 297 (50.3)               | 76 (50.7)              |
| <b>Age at diagnosis (Years)</b>        | 22.9 (14.0)                    | 21.2 (8.1)                | 13.1 (8.0)               | 14.5 (7.5)               | 8.3 (4.1)              |
| <b>Duration (Years)</b>                | 22.2 (13.5)                    | 5.7 (4.2)                 | 34.1 (9.0)               | 19.2 (9.0)               | 43.0 (6.7)             |
| <b>C-peptide</b>                       |                                |                           |                          |                          |                        |
| <b>N with detectable values</b>        | 1,727                          | 728                       | 83 (15.7%)               | 68 (11.5%)               | -                      |
| <b>Subjects with detectable values</b> | 4.76 (4.11-5.35) †             | 0.15 (0.08-0.27) *        | 58.82 (28.00-278.40) †   | 0.14 (0.07-0.46) *       | -                      |

Values are Mean (SD), N (%) or mean (25-75 percentiles).

\* pmol/mL

† pmol/L

**Table S3:** C-peptide measurement methods in different studies (10; 11)

| Study     | Time                                                  | Assay                                                                                | Lower Limit of Detection |
|-----------|-------------------------------------------------------|--------------------------------------------------------------------------------------|--------------------------|
| SDRNT1BIO | Non-fasting                                           | Roche electrochemiluminescence assay                                                 | 3 pmol/L                 |
| DCCT      | After 8-12 hr fasting<br>90 mins after standard meal* | M-1230 antiserum and other reagents obtained from Novo Industri (Bagsvaerd, Denmark) | 0.03 pmol/mL             |
| CACTI     | After 12 hr fasting                                   | ALPCO C-peptide ELISA Kit (ALPCO, Salem, NH)                                         | 16 pmol/L                |
| WESDR     | Non-Fasting                                           | Radioimmunoassay with Heding's M1230 antiserum                                       | 0.03 pmol/mL             |

\* 6 mL of Sustacal/kg of body weight to a maximum of 360 mL (Mead-Johnson, Evansville, Indiana; 1 calorie/mL; 55% carbohydrate, 24% protein, and 21% fat) in a period not exceeding 10 minutes

**Table S4:** Genotyping platforms used in different studies (10; 11)

| Study               | Genotyping Platform               |
|---------------------|-----------------------------------|
| SDRNT1BIO           | Illumina HumanCoreExome           |
| DCCT                | Illumina 1M BeadArray             |
| CACTI               | Illumina HumanCoreExome           |
| WESDR               | Illumina HumanCoreExome           |
| EDC                 | Illumina HumanCoreExome           |
| Generation Scotland | Illumina OmniExpressExome 8V 1-2A |

**Table S5:** C-peptide GWAS and meta-GWAs characteristics

| Study     | Subjects | SNPs      | GC Lambda |
|-----------|----------|-----------|-----------|
| SDRNT1BIO | 4,828    | 8,323,557 | 1.01      |
| DCCT      | 1,304    | 8,714,127 | 1.00      |
| CACTI     | 529      | 8,313,150 | 1.01      |
| WESDR     | 591      | 8,212,213 | 0.99      |
| Meta-GWAS | 7,252    | 8,150,645 | 1.01      |

GC: Genomic control

**Table S6:** Association of *DR-DQ* haplotype combinations with C-peptide

|               | SDRNT1BIO (N = 4,828) |       |      |        | DCCT (N = 1,304) |       |      |      | CACTI (N = 529) |       |      |          | WESDR (N = 591) |       |      |          | Meta-analysis |       |      |          |            |                    |          |
|---------------|-----------------------|-------|------|--------|------------------|-------|------|------|-----------------|-------|------|----------|-----------------|-------|------|----------|---------------|-------|------|----------|------------|--------------------|----------|
| HLA Haplotype | N                     | Beta  | SE   | P      | N                | Beta  | SE   | P    | N               | Beta  | SE   | P        | N               | Beta  | SE   | P        | Freq          | Beta  | SE   | P        | Direction* | Het I <sup>2</sup> | Het P    |
| DR3/X         | 894                   | 0.06  | 0.13 | 0.63   | 221              | 0.03  | 0.10 | 0.73 | 109             | -0.06 | 0.13 | 0.63     | 91              | -0.39 | 0.12 | 1.28E-03 | 0.18          | -0.08 | 0.06 | 0.16     | +++        | 66.90              | 0.03     |
| DR3/DR3       | 654                   | 0.08  | 0.14 | 0.57   | 113              | 0.03  | 0.11 | 0.79 | 35              | 0.04  | 0.17 | 0.81     | 39              | -0.36 | 0.15 | 1.40E-02 | 0.09          | -0.04 | 0.07 | 0.58     | +++        | 49.20              | 0.12     |
| DR3/DR4       | 1333                  | 0.14  | 0.12 | 0.27   | 336              | 0.11  | 0.09 | 0.22 | 136             | -0.09 | 0.13 | 0.50     | 171             | -0.24 | 0.11 | 2.82E-02 | 0.27          | -0.01 | 0.05 | 0.92     | +++        | 62.90              | 4.43E-02 |
| DR4/X         | 1092                  | -0.01 | 0.12 | 0.95   | 360              | 0.06  | 0.09 | 0.51 | 153             | -0.16 | 0.12 | 0.20     | 178             | -0.30 | 0.11 | 7.03E-03 | 0.28          | -0.08 | 0.05 | 0.12     | +++        | 58.30              | 0.07     |
| DR4/DR4       | 387                   | 0.15  | 0.15 | 0.32   | 118              | -0.09 | 0.11 | 0.45 | 42              | 0.13  | 0.16 | 0.43     | 46              | -0.18 | 0.14 | 0.19     | 0.08          | -0.02 | 0.07 | 0.74     | ++         | 22.50              | 0.28     |
| DR3/DR15      | 30                    | 0.85  | 0.39 | 3.E-02 | 3                | 0.08  | 0.52 | 0.87 | 3               | -0.34 | 0.44 | 0.44     | 2               | 0.62  | 0.49 | 0.20     | 0.01          | 0.34  | 0.23 | 0.13     | +++        | 35.80              | 0.20     |
| DR4/DR15      | 40                    | 1.12  | 0.34 | 1.E-03 | 10               | 0.20  | 0.29 | 0.50 | 4               | 0.19  | 0.38 | 0.61     | 7               | 0.47  | 0.27 | 0.09     | 0.01          | 0.48  | 0.16 | 2.00E-03 | ++++       | 40.70              | 0.17     |
| DR15/X        | 35                    | 1.51  | 0.36 | 3.E-05 | 7                | 0.23  | 0.35 | 0.51 | 2               | -0.23 | 0.53 | 0.67     | 9               | 1.04  | 0.24 | 2.41E-05 | 0.01          | 0.84  | 0.16 | 3.95E-07 | +++        | 73.40              | 1.04E-02 |
| DR15/DR15     | 3                     | 2.05  | 1.18 | 0.08   | 0                | NA    | NA   | NA   | 1               | 2.35  | 0.74 | 1.57E-03 | 0               | NA    | NA   | NA       | 0.00          | 2.27  | 0.63 | 3.02E-04 | +?+?       | 0.00               | 0.83     |
| X/X           | 360                   | Ref   |      |        | 136              | Ref   |      |      | 44              | Ref   |      |          | 48              | Ref   |      |          | 0.08          | Ref   |      |          |            |                    |          |

Het: Heterogeneity, Freq = Frequency

\* The order of studies is SDRNT1BIO, DCCT, CACTI and WESDR.

**Table S7:** Association of *DR-DQ* haplotype combinations with risk of type 1 diabetes

|                  | Generation Scotland |           | SDRNT1BIO |           |       |      |         |
|------------------|---------------------|-----------|-----------|-----------|-------|------|---------|
| HLA Haplotype    | N                   | Frequency | N         | Frequency | Beta  | SE   | P       |
| <i>DR3/X</i>     | 1225                | 0.16      | 922       | 0.19      | 1.53  | 0.09 | 2.E-70  |
| <i>DR3/DR3</i>   | 207                 | 0.03      | 645       | 0.13      | 3.25  | 0.13 | 2.E-129 |
| <i>DR3/DR4</i>   | 430                 | 0.06      | 1341      | 0.27      | 2.92  | 0.09 | 1.E-216 |
| <i>DR4/X</i>     | 1298                | 0.17      | 1133      | 0.23      | 1.36  | 0.07 | 2.E-77  |
| <i>DR4/DR4</i>   | 209                 | 0.03      | 391       | 0.08      | 2.11  | 0.11 | 9.E-85  |
| <i>DR3/DR15</i>  | 392                 | 0.05      | 34        | 0.01      | -0.48 | 0.2  | 2.E-02  |
| <i>DR4/DR15</i>  | 432                 | 0.06      | 43        | 0.01      | -0.66 | 0.18 | 2.E-04  |
| <i>DR15/X</i>    | 1221                | 0.16      | 54        | 0.01      | -1.42 | 0.15 | 4.E-20  |
| <i>DR15/DR15</i> | 220                 | 0.03      | 5         | 0.00      | -1.97 | 0.46 | 2.E-05  |
| <i>X/X</i>       | 1840                | 0.25      | 390       | 0.08      | Ref   | Ref  | Ref     |
| <b>Total</b>     | 7474                | 1.00      | 4958      | 1.00      | -     | -    | -       |

**Table S8:** Association of non-HLA type 1 diabetes risk loci with C-peptide and AAD

| CHR | BP          | SNP         | T1D |    |      |          |            |       | CP |    |      |       |      |          | AOD |    |      |       |      |          |
|-----|-------------|-------------|-----|----|------|----------|------------|-------|----|----|------|-------|------|----------|-----|----|------|-------|------|----------|
|     |             |             | A1  | A2 | OR   | P        | Gene       | Study | A1 | A2 | Freq | BETA  | SE   | P        | A1  | A2 | Freq | BETA  | SE   | P        |
| 1   | 63,643,100  | rs2269241   | T   | C  | 1.11 | 4.67E-12 | PGM1       | R     | T  | C  | 0.22 | 0.04  | 0.02 | 9.86E-02 | T   | C  | 0.22 | -0.01 | 0.02 | 7.26E-01 |
| 1   | 92,358,141  | rs34090353  | G   | C  | 1.08 | 1.10E-08 | RPAP2      | R     | C  | G  | 0.62 | 0.01  | 0.02 | 6.63E-01 | C   | G  | 0.63 | 0.02  | 0.02 | 2.44E-01 |
| 1   | 113,834,946 | rs2476601   | G   | A  | 1.89 | 0        | PTPN22     | O     | A  | G  | 0.18 | 0.04  | 0.03 | 1.09E-01 | A   | G  | 0.18 | 0.03  | 0.03 | 2.47E-01 |
| 1   | 119,895,261 | rs2641348   | A   | G  | 1.11 | 1.61E-08 | NOTCH2     | R     | A  | G  | 0.12 | -0.01 | 0.03 | 6.89E-01 | A   | G  | 0.12 | 0.02  | 0.03 | 4.53E-01 |
| 1   | 154,465,420 | rs2229238   | T   | C  | 0.90 | 1.38E-12 | IL6R       | R     | T  | C  | 0.20 | 0.05  | 0.03 | 4.31E-02 | T   | C  | 0.20 | 0.00  | 0.03 | 9.36E-01 |
| 1   | 172,746,562 | rs78037977  | A   | G  | 0.88 | 2.41E-09 | FASLG      | R     | A  | G  | 0.11 | -0.03 | 0.03 | 3.68E-01 | A   | G  | 0.12 | 0.08  | 0.03 | 1.29E-02 |
| 1   | 192,570,207 | rs2816313   | G   | A  | 1.09 | 4.57E-09 | RGS1       | R     | A  | G  | 0.72 | 0.00  | 0.02 | 8.97E-01 | A   | G  | 0.72 | 0.10  | 0.02 | 1.53E-05 |
| 1   | 200,845,831 | rs6691977   | T   | C  | 1.13 | 4.30E-08 |            | O     | T  | C  | 0.21 | 0.05  | 0.02 | 4.00E-02 | T   | C  | 0.21 | -0.07 | 0.02 | 4.71E-03 |
| 1   | 206,766,559 | rs3024505   | G   | A  | 0.86 | 6.40E-08 | IL10       | O     | A  | G  | 0.86 | -0.03 | 0.03 | 2.58E-01 | A   | G  | 0.87 | -0.04 | 0.03 | 1.35E-01 |
| 1   | 212,796,238 | rs11120029  | G   | T  | 1.10 | 1.82E-08 | TATDN3     | R     | T  | G  | 0.84 | -0.04 | 0.03 | 1.84E-01 | T   | G  | 0.84 | -0.01 | 0.03 | 7.48E-01 |
| 2   | 12,512,805  | rs10169963  | C   | T  | 1.07 | 2.78E-08 | AC096559.1 | R     | T  | C  | 0.58 | -0.02 | 0.02 | 4.05E-01 | T   | C  | 0.58 | 0.01  | 0.02 | 5.47E-01 |
| 2   | 100,147,438 | rs12712067  | G   | T  | 0.93 | 4.12E-09 | AFF3       | R     | T  | G  | 0.65 | -0.03 | 0.02 | 1.59E-01 | T   | G  | 0.66 | -0.02 | 0.02 | 3.91E-01 |
| 2   | 100,147,625 | rs13415583  | T   | G  | 0.90 | 1.10E-07 | AFF3       | O     | T  | G  | 0.35 | 0.03  | 0.02 | 1.49E-01 | T   | G  | 0.34 | 0.02  | 0.02 | 4.36E-01 |
| 2   | 110,857,502 | rs4849135   | G   | T  | 0.89 | 4.40E-08 |            | O     | T  | G  | 0.28 | -0.03 | 0.02 | 1.79E-01 | T   | G  | 0.28 | 0.00  | 0.02 | 8.86E-01 |
| 2   | 162,254,026 | rs2111485   | G   | A  | 0.85 | 3.80E-18 | IFIH1      | O     | A  | G  | 0.36 | -0.01 | 0.02 | 6.83E-01 | A   | G  | 0.36 | -0.02 | 0.02 | 4.02E-01 |
| 2   | 162,268,127 | rs35667974  | T   | C  | 0.59 | 9.30E-09 | IFIH1      | O     | NA | NA | NA   | NA    | NA   | NA       | T   | C  | 0.01 | 0.08  | 0.10 | 4.14E-01 |
| 2   | 162,280,432 | rs72871627  | A   | G  | 0.61 | 2.40E-06 | IFIH1      | O     | NA | NA | NA   | NA    | NA   | NA       | NA  | NA | NA   | NA    | NA   | NA       |
| 2   | 191,105,394 | rs7582694   | C   | G  | 0.92 | 2.83E-09 | STAT4      | R     | C  | G  | 0.24 | 0.01  | 0.02 | 5.60E-01 | C   | G  | 0.24 | 0.03  | 0.02 | 1.87E-01 |
| 2   | 203,874,196 | rs3087243   | G   | A  | 0.84 | 7.40E-21 | CTLA4      | O     | A  | G  | 0.62 | 0.00  | 0.02 | 9.17E-01 | A   | G  | 0.62 | -0.06 | 0.02 | 6.58E-03 |
| 2   | 241,468,331 | rs10933559  | A   | G  | 1.11 | 2.39E-11 | FARP2      | R     | A  | G  | 0.22 | 0.02  | 0.02 | 5.13E-01 | A   | G  | 0.22 | 0.00  | 0.02 | 9.23E-01 |
| 3   | 46,415,921  | rs113010081 | T   | C  | 0.85 | 4.60E-08 | CCR5       | O     | T  | C  | 0.12 | 0.04  | 0.03 | 2.71E-01 | T   | C  | 0.12 | 0.06  | 0.03 | 7.67E-02 |
| 4   | 973,543     | rs113881148 | C   | A  | 1.08 | 5.72E-09 | TMEM175    | R     | A  | C  | 0.64 | 0.02  | 0.02 | 3.33E-01 | A   | C  | 0.64 | 0.01  | 0.02 | 5.10E-01 |
| 4   | 38,602,849  | rs337637    | G   | A  | 0.92 | 2.57E-10 | KLF3       | R     | A  | G  | 0.65 | -0.01 | 0.02 | 7.28E-01 | A   | G  | 0.64 | -0.03 | 0.02 | 2.28E-01 |
| 4   | 122,322,441 | rs75793288  | C   | G  | 1.15 | 5.60E-13 | IL2, IL21  | O     | NA | NA | NA   | NA    | NA   | NA       | NA  | NA | NA   | NA    | NA   | NA       |
| 4   | 165,653,115 | rs2611215   | G   | A  | 1.18 | 1.80E-11 |            | O     | A  | G  | 0.18 | 0.02  | 0.03 | 3.49E-01 | A   | G  | 0.18 | 0.02  | 0.03 | 5.48E-01 |
| 5   | 35,883,149  | rs11954020  | C   | G  | 1.11 | 4.40E-08 | IL7R       | O     | C  | G  | 0.41 | 0.01  | 0.02 | 7.56E-01 | C   | G  | 0.41 | -0.01 | 0.02 | 6.65E-01 |

|     |             |            | T1D |    |      |          |               |       | CP |    |      |       |      |          | AOD |    |      |       |      |          |
|-----|-------------|------------|-----|----|------|----------|---------------|-------|----|----|------|-------|------|----------|-----|----|------|-------|------|----------|
| CHR | BP          | SNP        | A1  | A2 | OR   | P        | Gene          | Study | A1 | A2 | Freq | BETA  | SE   | P        | A1  | A2 | Freq | BETA  | SE   | P        |
| 5   | 40,521,603  | rs1876142  | G   | T  | 0.91 | 2.18E-14 | PTGER4        | R     | T  | G  | 0.63 | 0.00  | 0.02 | 9.31E-01 | T   | G  | 0.64 | -0.01 | 0.02 | 5.55E-01 |
| 5   | 56,146,422  | rs10213692 | T   | C  | 0.91 | 2.85E-09 | ANKRD55/IL6ST | R     | T  | C  | 0.23 | 0.01  | 0.02 | 7.55E-01 | T   | C  | 0.23 | 0.02  | 0.02 | 5.24E-01 |
| 6   | 424,915     | rs9405661  | C   | A  | 1.08 | 2.26E-09 | IRF4          | R     | A  | C  | 0.53 | 0.01  | 0.02 | 6.44E-01 | A   | C  | 0.54 | -0.02 | 0.02 | 4.41E-01 |
| 6   | 90,267,049  | rs72928038 | G   | A  | 1.20 | 6.40E-14 | BACH2         | O     | A  | G  | 0.80 | 0.03  | 0.03 | 2.20E-01 | A   | G  | 0.80 | -0.01 | 0.03 | 6.04E-01 |
| 6   | 126,431,738 | rs1538171  | C   | G  | 1.12 | 7.40E-10 |               | O     | C  | G  | 0.48 | 0.00  | 0.02 | 9.08E-01 | C   | G  | 0.48 | -0.01 | 0.02 | 5.36E-01 |
| 6   | 137,682,468 | rs12665429 | T   | C  | 0.91 | 1.36E-13 | TNFAIP3       | R     | T  | C  | 0.36 | -0.03 | 0.02 | 1.16E-01 | T   | C  | 0.37 | 0.02  | 0.02 | 4.00E-01 |
| 6   | 159,049,210 | rs212408   | G   | T  | 1.11 | 1.42E-15 | TAGAP         | R     | T  | G  | 0.65 | -0.03 | 0.02 | 2.40E-01 | T   | G  | 0.65 | -0.01 | 0.02 | 6.36E-01 |
| 7   | 20,557,306  | rs17143056 | A   | G  | 0.91 | 2.44E-08 | ABCB5         | O     | A  | G  | 0.18 | 0.03  | 0.03 | 3.37E-01 | A   | G  | 0.18 | 0.02  | 0.03 | 3.92E-01 |
| 7   | 28,102,567  | rs10245867 | G   | T  | 0.93 | 3.15E-08 | JAZF1         | R     | T  | G  | 0.68 | -0.03 | 0.02 | 2.34E-01 | T   | G  | 0.69 | -0.02 | 0.02 | 3.08E-01 |
| 7   | 50,398,132  | rs62447205 | A   | G  | 0.89 | 2.50E-08 | IKZF1         | O     | A  | G  | 0.26 | -0.02 | 0.02 | 3.49E-01 | A   | G  | 0.26 | 0.07  | 0.02 | 2.71E-03 |
| 7   | 50,961,290  | rs10277986 | A   | T  | 0.76 | 1.40E-07 |               | O     | A  | T  | 0.96 | -0.13 | 0.08 | 8.79E-02 | A   | T  | 0.96 | 0.12  | 0.06 | 6.55E-02 |
| 8   | 11,877,675  | rs2250903  | G   | T  | 0.91 | 1.35E-10 | CTSB          | R     | T  | G  | 0.73 | -0.01 | 0.02 | 6.95E-01 | T   | G  | 0.73 | -0.01 | 0.02 | 7.26E-01 |
| 9   | 4,290,823   | rs6476839  | A   | T  | 1.12 | 1.00E-09 | GLIS3         | O     | A  | T  | 0.42 | -0.02 | 0.02 | 3.71E-01 | A   | T  | 0.41 | -0.06 | 0.02 | 1.87E-03 |
| 9   | 99,823,263  | rs1405209  | T   | C  | 1.08 | 3.45E-08 | NR4A3         | R     | T  | C  | 0.38 | -0.03 | 0.02 | 1.93E-01 | T   | C  | 0.37 | 0.01  | 0.02 | 4.81E-01 |
| 10  | 6,052,734   | rs61839660 | C   | T  | 0.62 | 2.80E-39 | IL2RA         | O     | T  | C  | 0.93 | 0.10  | 0.04 | 1.73E-02 | T   | C  | 0.93 | -0.19 | 0.04 | 2.00E-06 |
| 10  | 6,066,377   | rs10795791 | A   | G  | 1.16 | 5.60E-11 | IL2RA         | O     | A  | G  | 0.45 | 0.00  | 0.02 | 9.49E-01 | A   | G  | 0.45 | 0.01  | 0.02 | 4.58E-01 |
| 10  | 6,087,680   | rs41295121 | C   | T  | 0.49 | 4.90E-08 | IL2RA         | O     | NA | NA | NA   | NA    | NA   | NA       | NA  | NA | NA   | NA    | NA   | NA       |
| 10  | 33,137,219  | rs722988   | T   | C  | 1.11 | 3.21E-15 | NRP1          | R     | T  | C  | 0.39 | 0.02  | 0.02 | 3.31E-01 | T   | C  | 0.39 | -0.02 | 0.02 | 4.48E-01 |
| 10  | 88,275,897  | rs12416116 | C   | A  | 0.85 | 3.90E-15 |               | O     | A  | C  | 0.74 | 0.01  | 0.02 | 6.91E-01 | A   | C  | 0.75 | -0.04 | 0.02 | 1.10E-01 |
| 11  | 2,160,994   | rs689      | T   | A  | 0.42 | 0        | INS           | O     | A  | T  | 0.16 | -0.14 | 0.03 | 6.34E-07 | A   | T  | 0.16 | -0.08 | 0.03 | 4.03E-03 |
| 11  | 2,177,435   | rs72853903 | C   | T  | 0.85 | 6.20E-10 | INS           | O     | T  | C  | 0.75 | -0.05 | 0.02 | 2.58E-02 | T   | C  | 0.76 | -0.06 | 0.02 | 1.90E-02 |
| 11  | 35,267,496  | rs11033048 | C   | T  | 1.09 | 1.53E-10 | SLC1A2        | R     | T  | C  | 0.59 | 0.00  | 0.02 | 9.37E-01 | T   | C  | 0.59 | -0.03 | 0.02 | 1.43E-01 |
| 11  | 60,961,822  | rs79538630 | G   | T  | 1.21 | 1.14E-09 | CD5/CD6       | R     | T  | G  | 0.96 | -0.03 | 0.05 | 5.26E-01 | T   | G  | 0.96 | 0.07  | 0.05 | 1.92E-01 |
| 11  | 61,828,092  | rs968567   | C   | T  | 0.90 | 8.42E-09 | FADS2         | R     | T  | C  | 0.83 | 0.00  | 0.03 | 8.78E-01 | T   | C  | 0.83 | -0.02 | 0.03 | 4.82E-01 |
| 11  | 64,367,826  | rs645078   | A   | C  | 0.93 | 3.34E-09 | CCDC88B       | R     | A  | C  | 0.36 | 0.02  | 0.02 | 4.58E-01 | A   | C  | 0.36 | 0.00  | 0.02 | 9.08E-01 |
| 11  | 128,734,337 | rs605093   | G   | T  | 1.08 | 4.25E-09 | FLI1          | R     | T  | G  | 0.52 | 0.02  | 0.02 | 2.77E-01 | T   | G  | 0.53 | -0.01 | 0.02 | 5.63E-01 |
| 12  | 8,942,630   | rs1805731  | T   | C  | 1.07 | 4.16E-08 | M6PR          | R     | T  | C  | 0.40 | 0.02  | 0.02 | 2.77E-01 | T   | C  | 0.39 | -0.05 | 0.02 | 1.11E-02 |
| 12  | 9,753,255   | rs917911   | A   | C  | 1.10 | 1.90E-07 | CD69          | O     | A  | C  | 0.38 | 0.01  | 0.02 | 6.95E-01 | A   | C  | 0.38 | -0.04 | 0.02 | 4.14E-02 |

|     |             |            | T1D |    |      |          |                        |       | CP |    |      |       |      |          | AOD |    |      |       |      |          |
|-----|-------------|------------|-----|----|------|----------|------------------------|-------|----|----|------|-------|------|----------|-----|----|------|-------|------|----------|
| CHR | BP          | SNP        | A1  | A2 | OR   | P        | Gene                   | Study | A1 | A2 | Freq | BETA  | SE   | P        | A1  | A2 | Freq | BETA  | SE   | P        |
| 12  | 53,077,434  | rs7313065  | C   | A  | 1.10 | 3.28E-09 | ITGB7                  | R     | A  | C  | 0.83 | 0.03  | 0.03 | 2.31E-01 | A   | C  | 0.83 | -0.01 | 0.03 | 6.97E-01 |
| 12  | 56,041,720  | rs705705   | G   | C  | 1.25 | 4.40E-32 | IKZF4                  | O     | NA | NA | NA   | NA    | NA   | NA       | NA  | NA | NA   | NA    | NA   | NA       |
| 12  | 111,569,952 | rs653178   | T   | C  | 1.30 | 1.60E-44 | SH2B3                  | O     | T  | C  | 0.56 | -0.02 | 0.02 | 2.54E-01 | T   | C  | 0.56 | -0.02 | 0.02 | 2.93E-01 |
| 13  | 42,343,795  | rs74537115 | C   | T  | 1.11 | 5.41E-09 | AKAP11                 | R     | T  | C  | 0.84 | 0.03  | 0.03 | 3.18E-01 | T   | C  | 0.84 | 0.01  | 0.03 | 6.10E-01 |
| 13  | 99,429,512  | rs9585056  | T   | C  | 1.12 | 3.30E-08 | GPR183                 | O     | T  | C  | 0.73 | 0.05  | 0.02 | 1.73E-02 | T   | C  | 0.73 | 0.01  | 0.02 | 5.73E-01 |
| 14  | 68,286,876  | rs911263   | C   | T  | 1.08 | 1.69E-08 | RAD51B                 | R     | T  | C  | 0.73 | 0.01  | 0.02 | 8.22E-01 | T   | C  | 0.74 | 0.04  | 0.02 | 1.10E-01 |
| 14  | 98,021,670  | rs1456988  | T   | G  | 1.12 | 2.90E-08 |                        | O     | T  | G  | 0.70 | -0.02 | 0.02 | 3.13E-01 | T   | G  | 0.71 | 0.02  | 0.02 | 3.21E-01 |
| 14  | 100,840,110 | rs56994090 | T   | C  | 0.88 | 1.10E-11 |                        | O     | T  | C  | 0.39 | -0.03 | 0.02 | 1.69E-01 | T   | C  | 0.38 | -0.02 | 0.02 | 4.58E-01 |
| 15  | 38,554,821  | rs72727394 | C   | T  | 1.15 | 3.60E-10 | RASGRP1                | O     | T  | C  | 0.78 | 0.00  | 0.02 | 8.42E-01 | T   | C  | 0.79 | 0.06  | 0.02 | 8.36E-03 |
| 15  | 78,942,615  | rs34593439 | G   | A  | 0.78 | 9.00E-14 | CTSH                   | O     | A  | G  | 0.92 | 0.01  | 0.04 | 7.89E-01 | A   | G  | 0.92 | -0.20 | 0.04 | 2.14E-07 |
| 16  | 11,100,914  | rs12927355 | C   | T  | 0.82 | 3.00E-22 | DEXI                   | O     | T  | C  | 0.72 | -0.06 | 0.02 | 1.34E-02 | T   | C  | 0.72 | 0.00  | 0.02 | 9.41E-01 |
| 16  | 11,257,354  | rs193778   | A   | G  | 1.14 | 4.40E-10 | DEXI                   | O     | A  | G  | 0.28 | -0.05 | 0.02 | 1.88E-02 | A   | G  | 0.28 | 0.02  | 0.02 | 2.92E-01 |
| 16  | 20,331,769  | rs4238595  | T   | C  | 0.91 | 2.43E-11 | UMOD                   | R     | NA | NA | NA   | NA    | NA   | NA       | NA  | NA | NA   | NA    | NA   | NA       |
| 16  | 28,494,339  | rs151234   | G   | C  | 1.19 | 4.80E-11 | IL27                   | O     | C  | G  | 0.85 | 0.07  | 0.03 | 1.77E-02 | C   | G  | 0.85 | 0.02  | 0.03 | 6.06E-01 |
| 16  | 75,218,429  | rs8056814  | G   | A  | 1.32 | 3.00E-19 | BCAR1                  | O     | A  | G  | 0.90 | -0.03 | 0.03 | 4.37E-01 | A   | G  | 0.90 | 0.05  | 0.03 | 1.91E-01 |
| 17  | 39,896,954  | rs12453507 | G   | C  | 0.90 | 1.00E-08 | IKZF3,ORMDL3,<br>GSDMB | O     | C  | G  | 0.48 | 0.00  | 0.02 | 8.44E-01 | C   | G  | 0.48 | -0.04 | 0.02 | 7.56E-02 |
| 17  | 40,618,898  | rs757411   | T   | C  | 0.90 | 1.10E-07 | CCR7                   | O     | T  | C  | 0.62 | 0.02  | 0.02 | 2.53E-01 | T   | C  | 0.62 | -0.02 | 0.02 | 4.66E-01 |
| 17  | 45,996,523  | rs1052553  | A   | G  | 0.88 | 1.65E-15 | MAPT                   | R     | A  | G  | 0.22 | 0.02  | 0.02 | 3.77E-01 | A   | G  | 0.21 | 0.03  | 0.03 | 3.10E-01 |
| 17  | 47,956,725  | rs2597169  | A   | G  | 1.08 | 3.35E-09 | PRR15L                 | R     | A  | G  | 0.36 | 0.04  | 0.02 | 5.07E-02 | A   | G  | 0.36 | -0.01 | 0.02 | 7.97E-01 |
| 18  | 12,809,341  | rs1893217  | A   | G  | 1.21 | 1.20E-15 | PTPN2                  | O     | A  | G  | 0.20 | -0.02 | 0.03 | 5.36E-01 | A   | G  | 0.20 | 0.01  | 0.03 | 7.24E-01 |
| 18  | 12,830,539  | rs12971201 | G   | A  | 0.89 | 2.10E-06 | PTPN2                  | O     | A  | G  | 0.63 | -0.02 | 0.02 | 3.21E-01 | A   | G  | 0.64 | -0.03 | 0.02 | 1.26E-01 |
| 18  | 69,859,408  | rs1615504  | C   | T  | 1.13 | 1.80E-11 | CD226                  | O     | T  | C  | 0.49 | -0.02 | 0.02 | 3.96E-01 | T   | C  | 0.49 | -0.01 | 0.02 | 6.82E-01 |
| 19  | 10,352,442  | rs34536443 | G   | C  | 0.67 | 4.40E-15 | TYK2                   | O     | C  | G  | 0.96 | 0.00  | 0.06 | 9.75E-01 | C   | G  | 0.97 | -0.03 | 0.06 | 6.29E-01 |
| 19  | 10,359,299  | rs12720356 | A   | C  | 0.82 | 3.70E-07 | TYK2                   | O     | A  | C  | 0.08 | 0.00  | 0.04 | 9.26E-01 | A   | C  | 0.08 | 0.03  | 0.04 | 4.60E-01 |
| 19  | 46,715,865  | rs402072   | T   | C  | 0.87 | 4.70E-08 |                        | O     | T  | C  | 0.14 | -0.07 | 0.03 | 2.76E-02 | T   | C  | 0.14 | 0.06  | 0.03 | 3.33E-02 |
| 19  | 48,702,915  | rs516246   | T   | C  | 0.87 | 5.20E-14 | FUT2                   | O     | T  | C  | 0.53 | 0.01  | 0.02 | 6.97E-01 | T   | C  | 0.55 | 0.00  | 0.02 | 8.45E-01 |
| 20  | 1,635,560   | rs6043409  | G   | A  | 0.88 | 3.00E-10 |                        | O     | A  | G  | 0.31 | 0.02  | 0.02 | 3.51E-01 | A   | G  | 0.32 | -0.01 | 0.02 | 6.14E-01 |
| 21  | 42,405,248  | rs11203202 | C   | G  | 1.16 | 1.20E-15 | UBASH3A                | O     | C  | G  | 0.37 | -0.01 | 0.02 | 6.53E-01 | C   | G  | 0.37 | 0.00  | 0.02 | 9.62E-01 |

|     |            |            | T1D |    |      |          |               |       | CP |    |      |       |      |          | AOD |    |      |       |      |          |
|-----|------------|------------|-----|----|------|----------|---------------|-------|----|----|------|-------|------|----------|-----|----|------|-------|------|----------|
| CHR | BP         | SNP        | A1  | A2 | OR   | P        | Gene          | Study | A1 | A2 | Freq | BETA  | SE   | P        | A1  | A2 | Freq | BETA  | SE   | P        |
| 21  | 44,201,934 | rs6518350  | A   | G  | 0.88 | 9.60E-08 | ICOSLG        | O     | NA | NA | NA   | NA    | NA   | NA       | NA  | NA | NA   | NA    | NA   | NA       |
| 21  | 44,204,668 | rs56178904 | C   | T  | 0.90 | 6.48E-11 | ICOSLG        | R     | NA | NA | NA   | NA    | NA   | NA       | NA  | NA | NA   | NA    | NA   | NA       |
| 22  | 30,135,102 | rs4820830  | T   | C  | 1.14 | 1.20E-12 |               | O     | T  | C  | 0.59 | -0.01 | 0.02 | 6.50E-01 | T   | C  | 0.59 | -0.03 | 0.02 | 1.22E-01 |
| 22  | 37,191,071 | rs229533   | A   | C  | 1.11 | 1.80E-08 | C1QTNF6, RAC2 | O     | A  | C  | 0.45 | 0.02  | 0.02 | 3.63E-01 | A   | C  | 0.45 | -0.03 | 0.02 | 1.88E-01 |

R: Robertson et al (12), O: Onengut-Gumuscu (13); A1: Non-effect allele; A2: Effect allele

**Table S9:** AAD GWAS and meta-GWAs characteristics

| <b>Study</b> | <b>Subjects</b> | <b>SNPs</b> | <b>GC Lambda</b> |
|--------------|-----------------|-------------|------------------|
| SDRNT1BIO    | 5,349           | 8,330,960   | 1.02             |
| DCCT         | 1,304           | 8,714,127   | 1.00             |
| CACTI        | 529             | 8,313,150   | 1.00             |
| WESDR        | 591             | 8,212,212   | 1.01             |
| EDC          | 150             | 8,162,100   | 1.01             |
| Meta-GWAS    | 7,923           | 8,154,710   | 1.02             |

GC: Genomic control

**Table S10:** Association of *DR-DQ* haplotype combinations with AAD

|               | SDRNT1BIO (N = 5342) |       |      |        | DCCT (N = 1304) |       |      |          | CACTI (N = 529) |       |      |          | WESDR (N = 591) |       |      |          | EDC (N = 150) |       |      |      | Meta-Analysis |       |      |          |            |                    |          |  |
|---------------|----------------------|-------|------|--------|-----------------|-------|------|----------|-----------------|-------|------|----------|-----------------|-------|------|----------|---------------|-------|------|------|---------------|-------|------|----------|------------|--------------------|----------|--|
| HLA Haplotype | N                    | Beta  | SE   | P      | N               | Beta  | SE   | P        | N               | Beta  | SE   | P        | N               | Beta  | SE   | P        | N             | Beta  | SE   | P    | Freq          | Beta  | SE   | P        | Direction* | Het I <sup>2</sup> | Het P    |  |
| DR3/X         | 988                  | -0.38 | 0.09 | 1.E-05 | 221             | -0.10 | 0.10 | 0.34     | 109             | 0.08  | 0.20 | 0.68     | 91              | -0.30 | 0.18 | 0.10     | 33            | -0.25 | 0.24 | 0.31 | 0.18          | -0.23 | 0.06 | 6.96E-05 | ---+       | 43.10              | 0.13     |  |
| DR3/DR3       | 678                  | -0.35 | 0.09 | 1.E-04 | 113             | -0.13 | 0.12 | 0.30     | 35              | -0.29 | 0.26 | 0.27     | 39              | -0.23 | 0.22 | 0.30     | 7             | 0.26  | 0.36 | 0.47 | 0.10          | -0.25 | 0.07 | 1.14E-04 | ----+      | 6.40               | 0.37     |  |
| DR3/DR4       | 1412                 | -0.78 | 0.08 | 8.E-22 | 336             | -0.33 | 0.10 | 5.47E-04 | 136             | -0.08 | 0.20 | 0.68     | 171             | -0.49 | 0.17 | 3.12E-03 | 47            | -0.10 | 0.23 | 0.68 | 0.27          | -0.52 | 0.05 | 7.68E-22 | -----      | 82.10              | 1.69E-04 |  |
| DR4/X         | 1207                 | -0.44 | 0.08 | 1.E-07 | 360             | -0.18 | 0.10 | 0.06     | 153             | -0.10 | 0.20 | 0.62     | 178             | -0.10 | 0.17 | 0.57     | 41            | -0.16 | 0.23 | 0.49 | 0.26          | -0.29 | 0.05 | 1.67E-07 | -----      | 44.40              | 0.13     |  |
| DR4/DR4       | 419                  | -0.35 | 0.10 | 5.E-04 | 118             | -0.23 | 0.12 | 0.06     | 42              | 0.07  | 0.25 | 0.77     | 46              | -0.08 | 0.21 | 0.71     | 4             | -0.12 | 0.44 | 0.79 | 0.08          | -0.25 | 0.07 | 3.43E-04 | ---+       | 0.00               | 0.49     |  |
| DR3/DR15      | 41                   | 0.23  | 0.24 | 0.35   | 3               | 0.94  | 0.56 | 0.09     | 3               | 0.00  | 0.68 | 1.00     | 2               | 1.43  | 0.74 | 0.05     | 0             | NA    | NA   | NA   | 0.01          | 0.39  | 0.20 | 0.05     | ++0+?      | 19.20              | 0.29     |  |
| DR4/DR15      | 58                   | 0.29  | 0.21 | 0.17   | 10              | 0.10  | 0.31 | 0.74     | 4               | -0.21 | 0.60 | 0.72     | 7               | -0.27 | 0.41 | 0.51     | 1             | 0.10  | 0.82 | 0.91 | 0.01          | 0.13  | 0.15 | 0.40     | ++++       | 0.00               | 0.76     |  |
| DR15/X        | 81                   | 0.80  | 0.18 | 1.E-05 | 7               | 0.04  | 0.37 | 0.91     | 2               | -2.27 | 0.83 | 6.16E-03 | 9               | 0.46  | 0.37 | 0.22     | 0             | NA    | NA   | NA   | 0.01          | 0.53  | 0.15 | 2.56E-04 | +++?       | 80.50              | 1.49E-03 |  |
| DR15/DR15     | 9                    | 0.14  | 0.50 | 0.79   | 0               | NA    | NA   | NA       | 1               | 0.86  | 1.15 | 0.46     | 0               | NA    | NA   | NA       | 0             | NA    | NA   | NA   | 0.00          | 0.25  | 0.46 | 0.58     | +?+??      | 0.00               | 0.57     |  |
| X/X           | 449                  | Ref   |      |        | 136             | Ref   |      |          | 44              | Ref   |      |          | 48              | Ref   |      |          | 17            | Ref   |      |      | 0.08          | Ref   |      |          |            |                    |          |  |

Het: Heterogeneity, Freq = Frequency

\* The order of studies is SDRNT1BIO, DCCT, CACTI, WESDR and EDC.

**Table S11:** Summary of the locus-specific genotypic scores computed for *CTSH* and their association with AAD

| Trait Type  | Trait Name             | CHR | Start       | End         | Type  | Tissue               | QTLs N | Strongest QTL P* | Effect | P        | FDR <0.05 |
|-------------|------------------------|-----|-------------|-------------|-------|----------------------|--------|------------------|--------|----------|-----------|
| Methylation | cg17270013             | 15  | 78,185,519  | 79,036,756  | cis   | Blood                | 482    | 0                | -0.096 | 4.61E-06 | TRUE      |
| Methylation | cg07448499             | 15  | 78,185,519  | 79,036,756  | cis   | Blood                | 449    | 0                | -0.084 | 5.62E-05 | TRUE      |
| Methylation | cg17922215             | 15  | 78,388,660  | 79,012,268  | cis   | Blood                | 368    | 0                | -0.082 | 9.20E-05 | TRUE      |
| Methylation | cg20059407             | 15  | 78,796,769  | 78,965,955  | cis   | Blood                | 340    | 2.40E-169        | -0.074 | 3.99E-04 | TRUE      |
| Methylation | cg25744700             | 15  | 77,955,110  | 79,019,093  | cis   | Blood                | 605    | 0                | -0.071 | 6.89E-04 | TRUE      |
| Methylation | cg08500346             | 15  | 78,672,020  | 78,966,343  | cis   | Blood                | 203    | 0                | 0.026  | 2.18E-01 | FALSE     |
| Transcript  | Expression(eQTLGen)    | 15  | 77,974,313  | 79,068,033  | cis   | Whole blood and PBMC | 1128   | 0                | -0.075 | 2.93E-04 | TRUE      |
| Transcript  | Expression(eQTLGen)    | 3   | 128,578,726 | 128,604,581 | trans | Whole blood and PBMC | 3      | 2.50E-08         | -0.016 | 4.39E-01 | FALSE     |
| Transcript  | Expression(eQTLGen)    | 2   | 43,494,369  | 43,494,369  | trans | Whole blood and PBMC | 1      | 6.75E-08         | 0.016  | 4.51E-01 | FALSE     |
| Protein     | Pro-cathepsin H Levels | 6   | 31,483,699  | 33,225,090  | trans | Blood plasma         | 1251   | 9.88E-11         | -2.007 | 4.44E-05 | TRUE      |
| Protein     | Pro-cathepsin H Levels | 15  | 67,936,125  | 88,137,453  | cis   | Blood plasma         | 8408   | 0                | -0.068 | 6.41E-03 | TRUE      |
| Protein     | Pro-cathepsin H Levels | 9   | 133,257,521 | 133,279,427 | trans | Blood plasma         | 7      | 1.81E-09         | -0.926 | 1.17E-01 | FALSE     |
| Protein     | Pro-cathepsin H Levels | 10  | 17,745,424  | 18,057,165  | trans | Blood plasma         | 38     | 1.12E-18         | 0.417  | 2.38E-01 | FALSE     |
| Protein     | Pro-cathepsin H Levels | 3   | 186,664,498 | 186,738,246 | trans | Blood plasma         | 98     | 3.11E-14         | -0.503 | 2.69E-01 | FALSE     |
| Protein     | Pro-cathepsin H Levels | 15  | 88,860,173  | 89,081,990  | trans | Blood plasma         | 16     | 1.27E-08         | -0.403 | 2.81E-01 | FALSE     |
| Protein     | Pro-cathepsin H Levels | 19  | 3,487,496   | 3,492,245   | trans | Blood plasma         | 2      | 2.28E-10         | -0.786 | 4.18E-01 | FALSE     |
| Protein     | Pro-cathepsin H Levels | 14  | 92,766,577  | 92,905,767  | trans | Blood plasma         | 129    | 9.26E-11         | -0.496 | 4.53E-01 | FALSE     |
| Protein     | Pro-cathepsin H Levels | 15  | 66,152,081  | 66,971,753  | trans | Blood plasma         | 87     | 7.71E-08         | -0.268 | 5.19E-01 | FALSE     |
| Protein     | Pro-cathepsin H Levels | 19  | 18,082,539  | 18,230,100  | trans | Blood plasma         | 141    | 6.56E-11         | 0.211  | 6.42E-01 | FALSE     |
| Protein     | Pro-cathepsin H Levels | 3   | 58,306,852  | 58,521,123  | trans | Blood plasma         | 164    | 2.04E-10         | 0.238  | 6.84E-01 | FALSE     |

\* values <2E-308 are truncated to 0.

**Table S12:** Summary of SNPs instruments for Pro-cathepsin H selected from Ferkingstad et al, 2021 (14)

| SNP         | CHR | BP(HG38)    | Effect Allele | Other Allele | Effect allele frequency | Effect | SE    | P         |
|-------------|-----|-------------|---------------|--------------|-------------------------|--------|-------|-----------|
| rs112348856 | 15  | 78,835,181  | A             | G            | 0.37                    | -0.357 | 0.009 | 2.23E-308 |
| rs62013198  | 15  | 78,931,980  | A             | T            | 0.11                    | 0.699  | 0.018 | 2.23E-308 |
| rs565840574 | 10  | 17,806,399  | G             | A            | 0.29                    | 0.070  | 0.008 | 1.12E-18  |
| rs5029990   | 3   | 186,721,030 | G             | C            | 0.21                    | 0.076  | 0.010 | 3.11E-14  |
| rs62120372  | 19  | 18,194,375  | A             | T            | 0.18                    | 0.059  | 0.009 | 6.56E-11  |
| rs75157919  | 15  | 78,955,738  | A             | G            | 0.16                    | 0.079  | 0.012 | 7.42E-11  |
| rs61991538  | 14  | 92,859,499  | A             | C            | 0.09                    | 0.059  | 0.009 | 9.26E-11  |
| rs55954186  | 3   | 58,450,749  | A             | G            | 0.15                    | 0.052  | 0.008 | 2.04E-10  |

**Table S13:** Summary of MR analysis of the effect of Pro-cathepsin H on AAD

| Method                    | Number of Instruments | Effect | SE   | P    |
|---------------------------|-----------------------|--------|------|------|
| Simple median             | 8                     | -0.06  | 0.15 | 0.68 |
| Inverse variance weighted | 8                     | -0.07  | 0.06 | 0.23 |
| Simple mode               | 8                     | -0.10  | 0.14 | 0.50 |

**Table S14:** Summary of MR analysis of the effect of Pro-cathepsin H on C-peptide

| Method                    | Number of Instruments | Effect | SE   | P    |
|---------------------------|-----------------------|--------|------|------|
| Simple median             | 8                     | -0.13  | 0.23 | 0.57 |
| Inverse variance weighted | 8                     | -0.08  | 0.10 | 0.44 |
| Simple mode               | 8                     | 0.03   | 0.22 | 0.88 |

## Supplementary Figures

**Figure S1:** QQ-plots regarding C-peptide GWAS

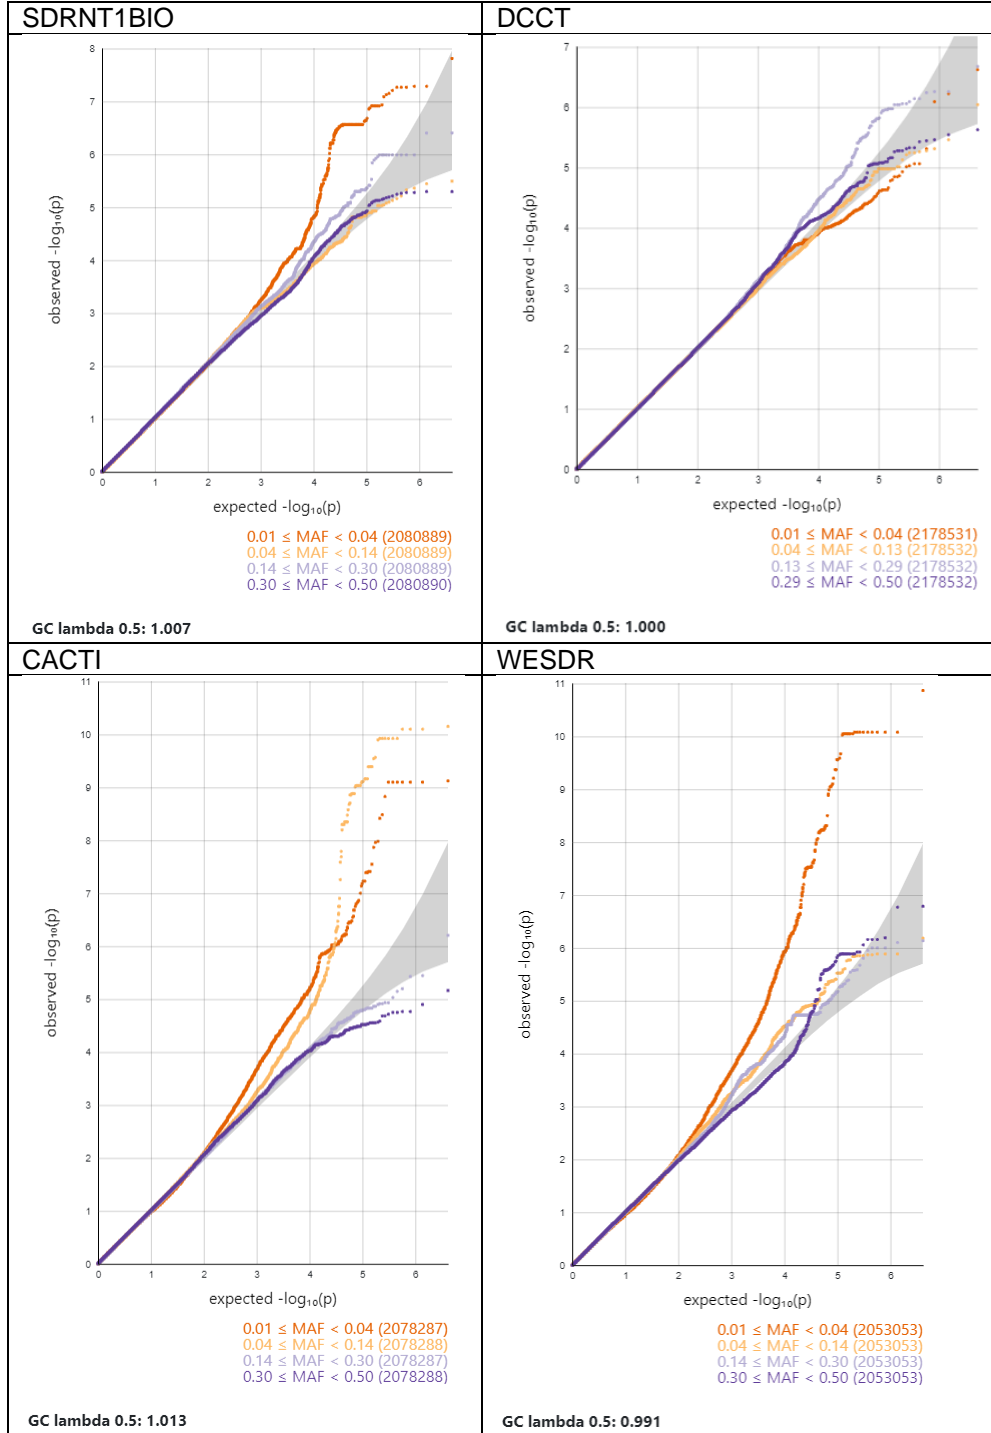

**Figure S2:** Manhattan plots regarding C-peptide GWAS

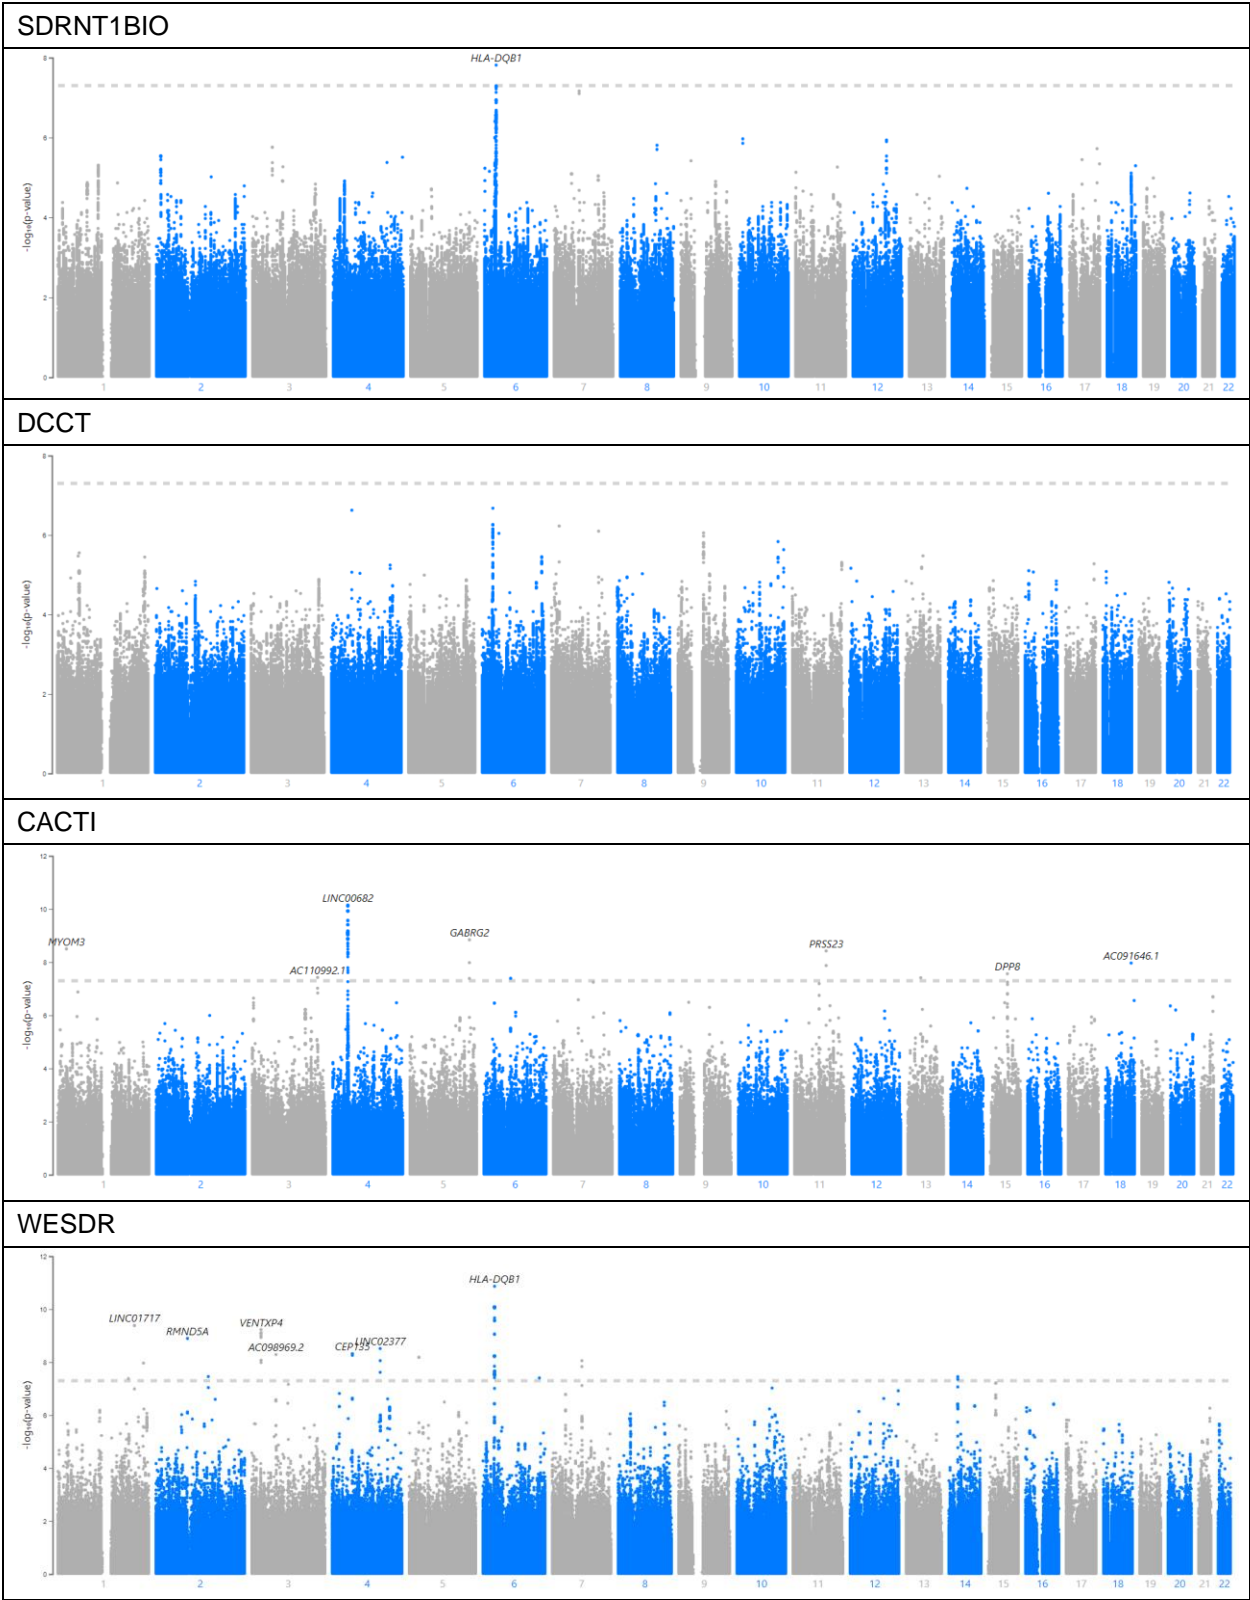

**Figure S3:** Association of HLA haplotypes, amino acid changes and SNP/indels associated with C-peptide at genome-wide significance threshold with risk of type 1 diabetes

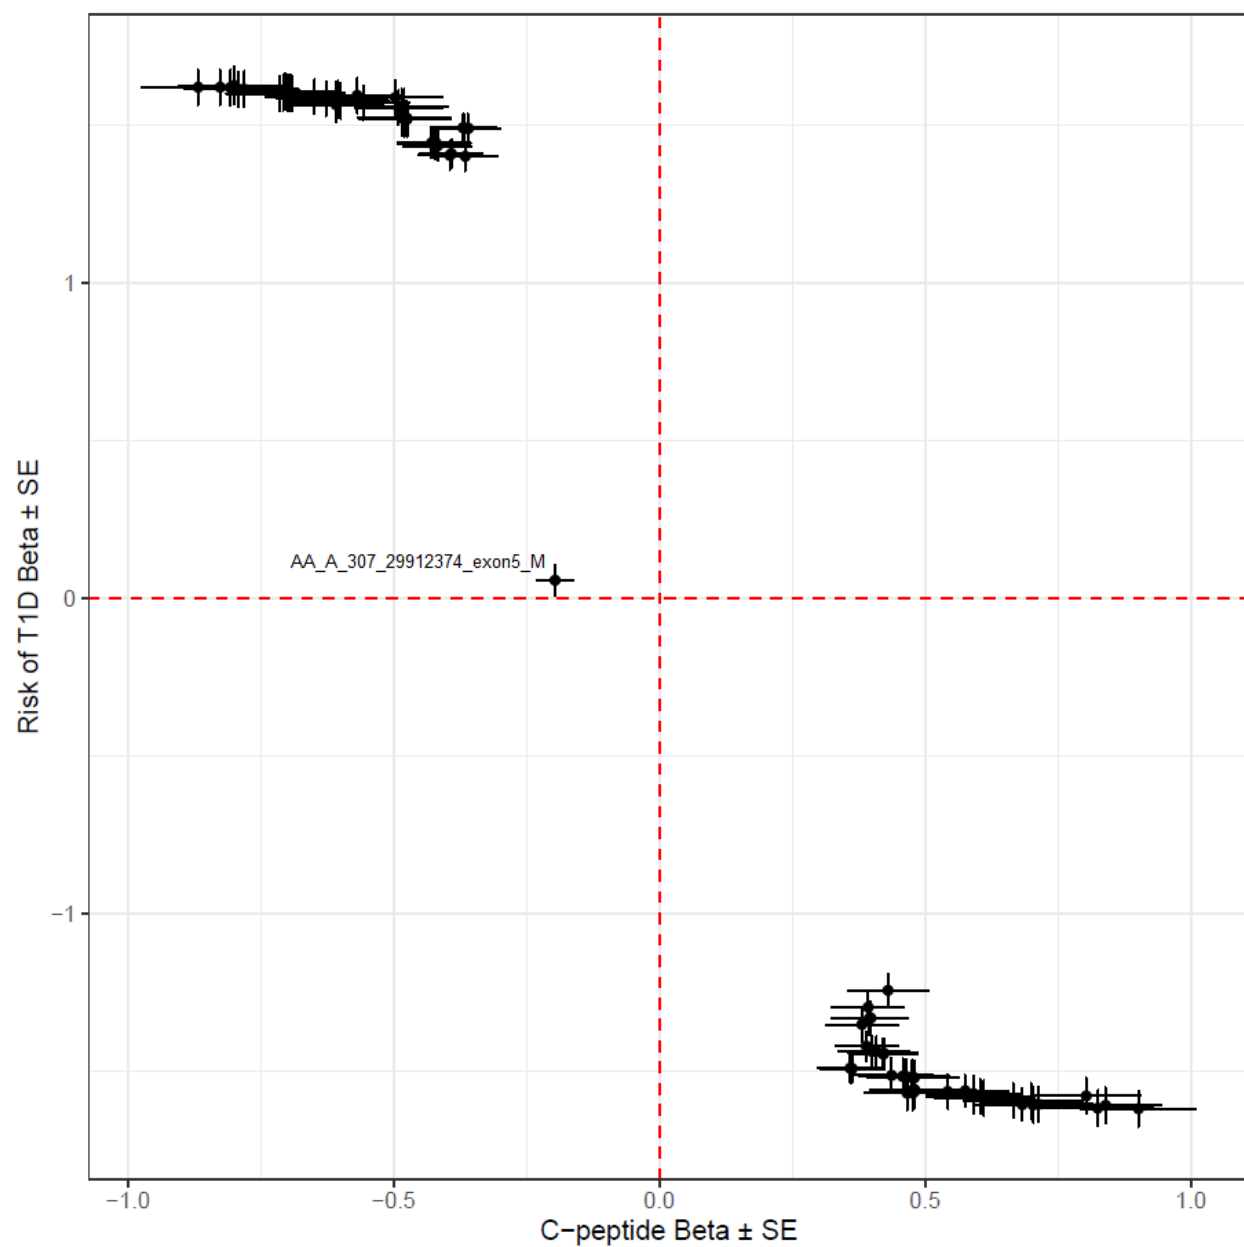

**Figure S4:** Association of HLA haplotypes, amino acid changes and SNP/indels associated with C-peptide at genome-wide significance threshold with age at type 1 diabetes diagnosis

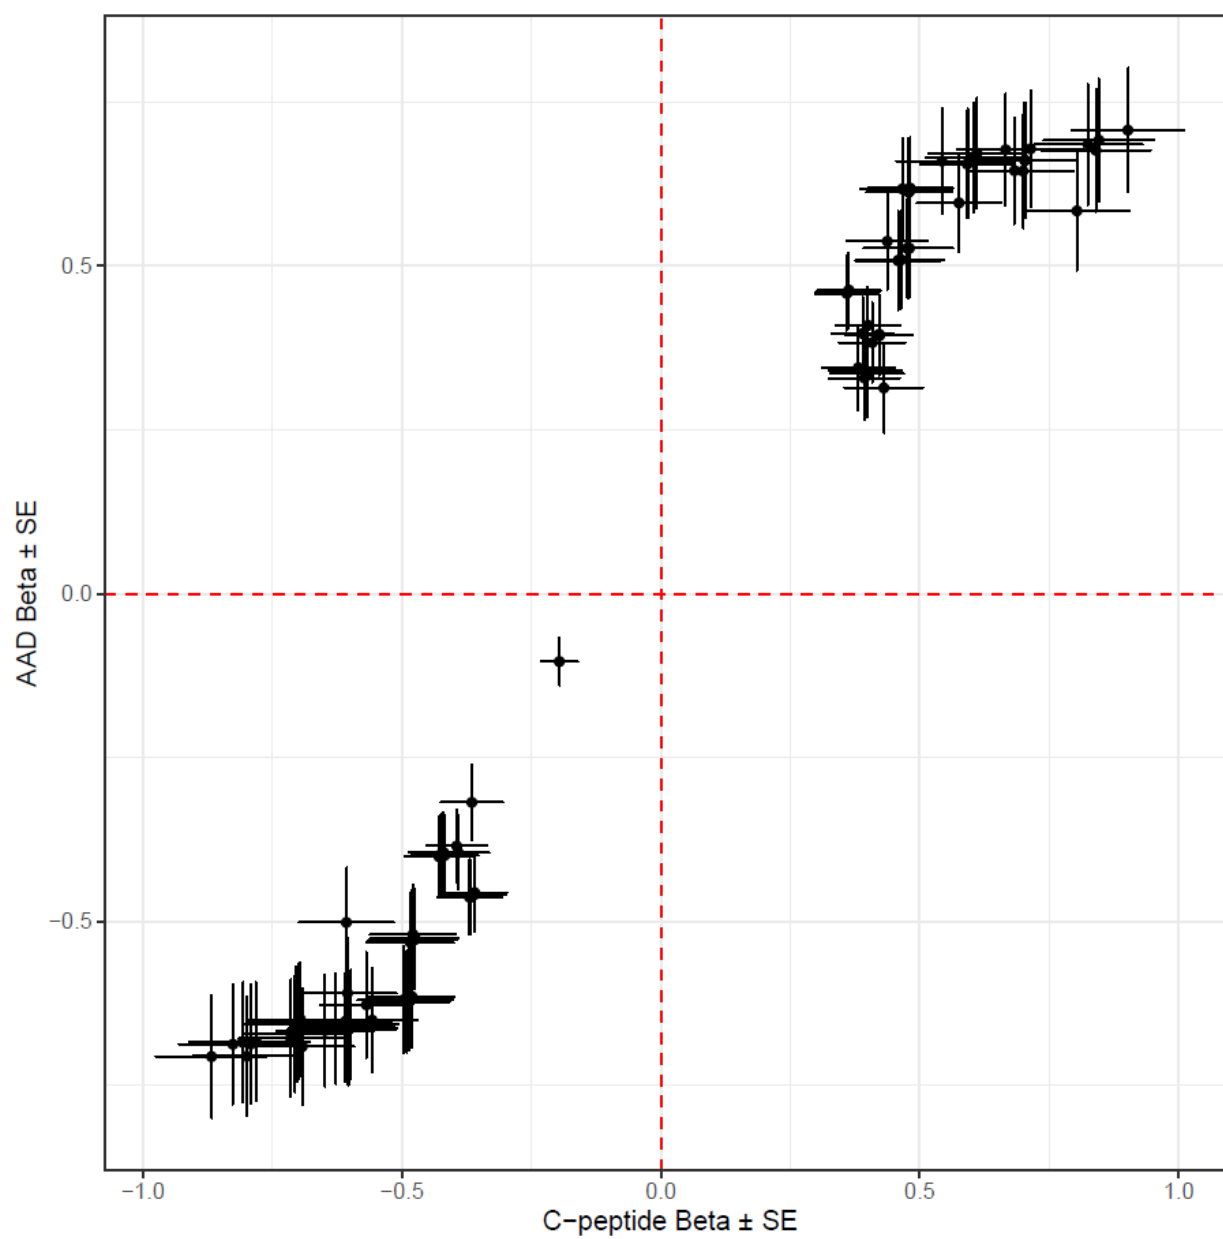

**Figure S5:** QQ-plots regarding AAD GWAS

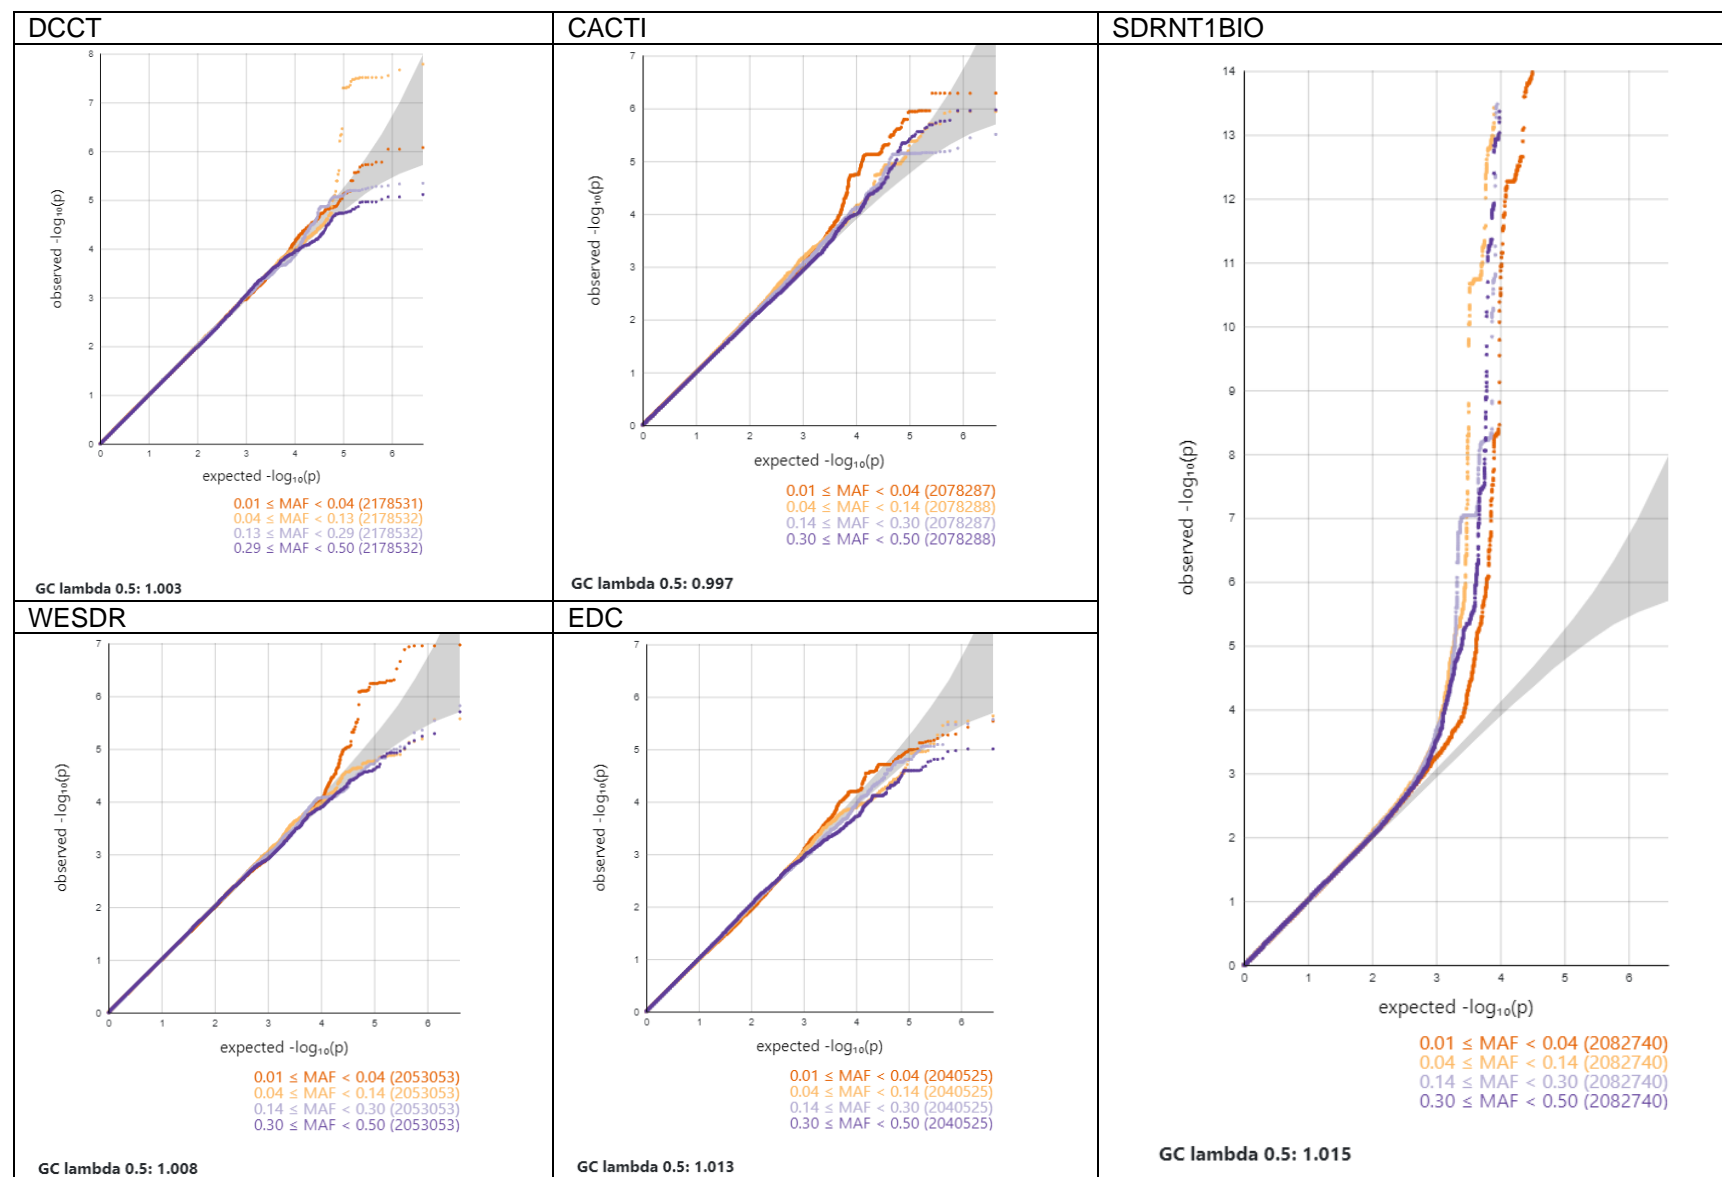

**Figure S6:** Manhattan plots regarding AAD GWAS

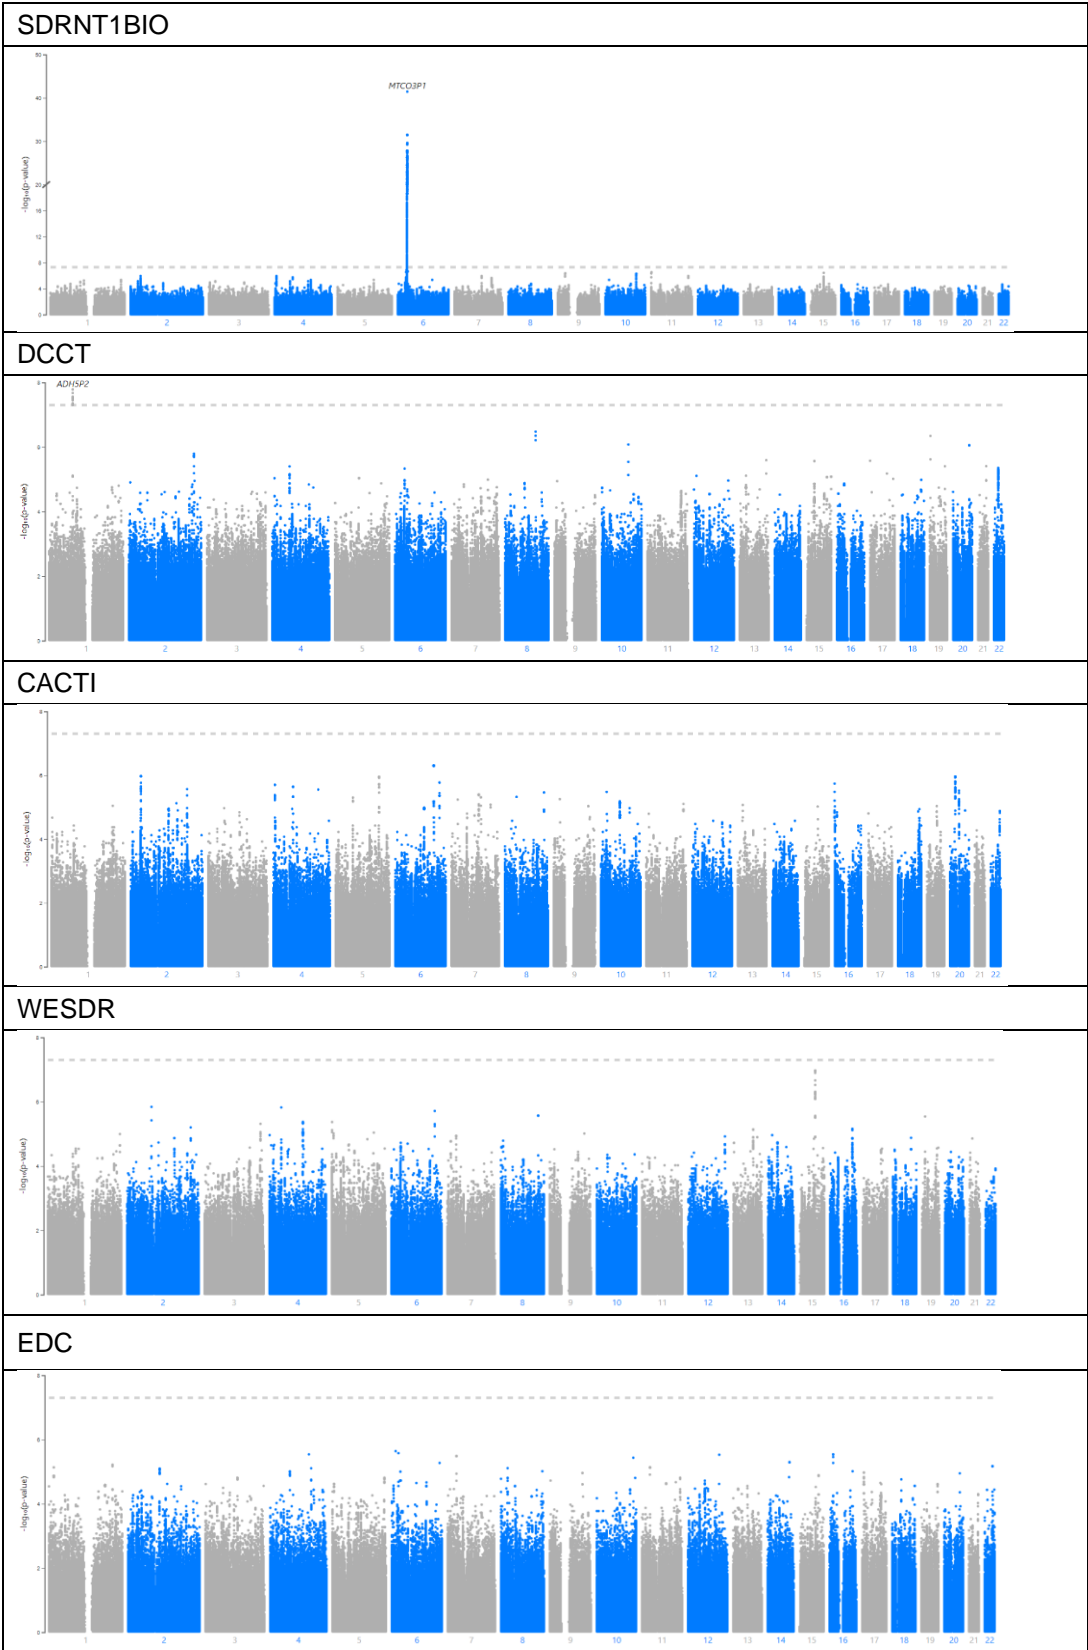

**Figure S7:** Association of HLA haplotypes, amino acid changes and SNP/indels associated with AAD at genome-wide significance threshold with type 1 diabetes risk

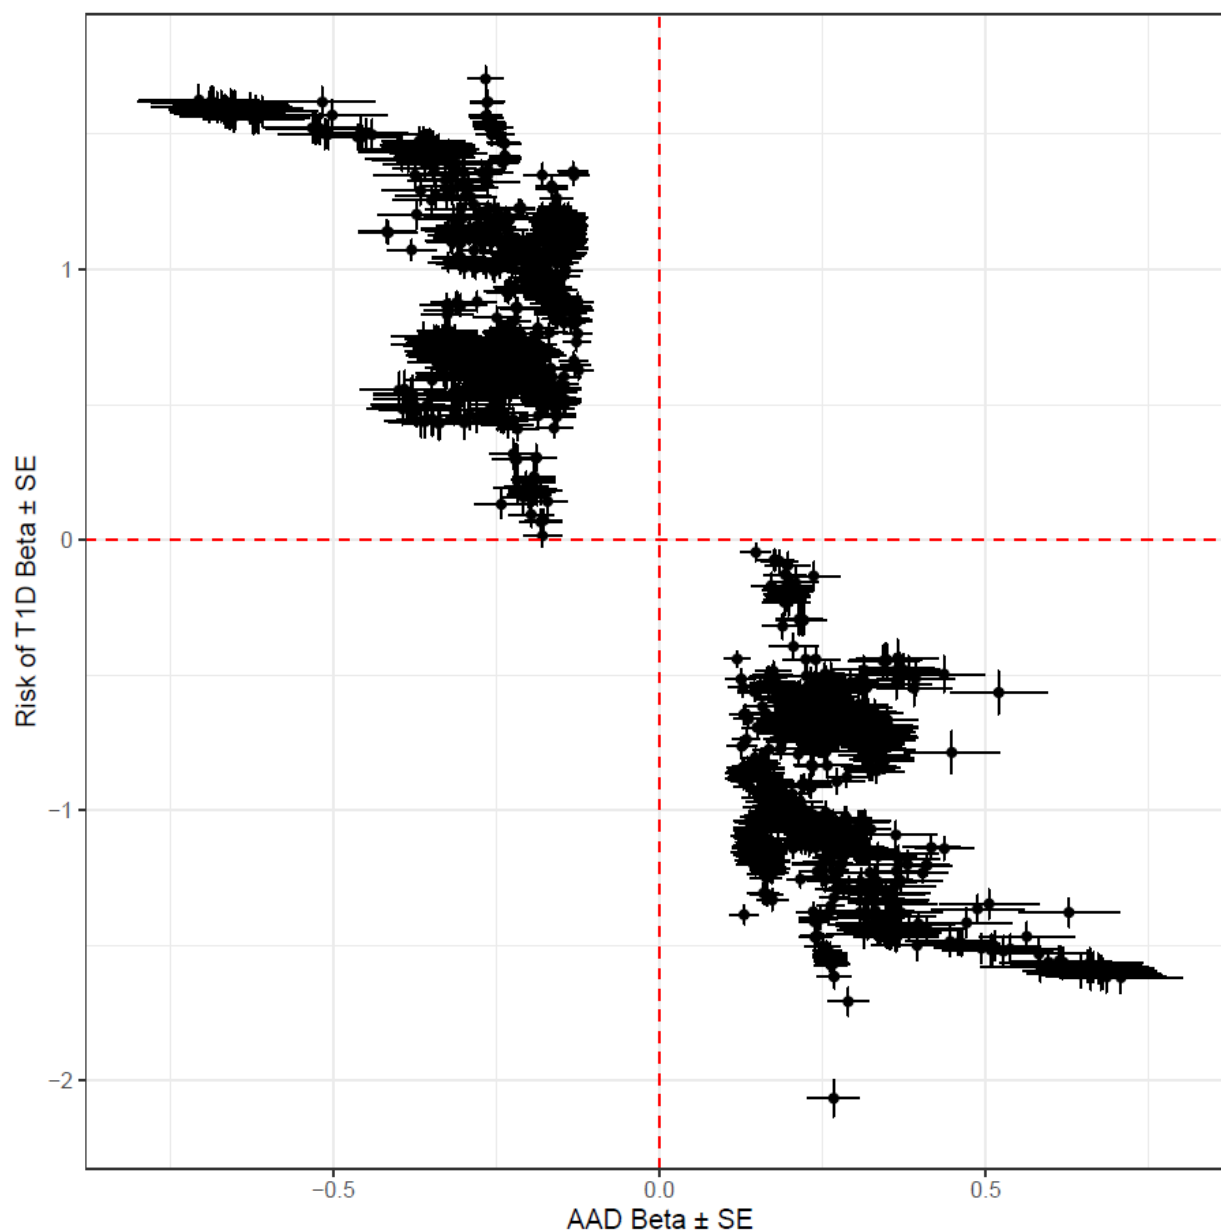

**Figure S8:** MR plot including scatter plot of the instrumental SNP effects on Pro-cathepsin H levels (exposure) vs. AAD (outcome). The lines correspond to MR fits for each of the methods used.

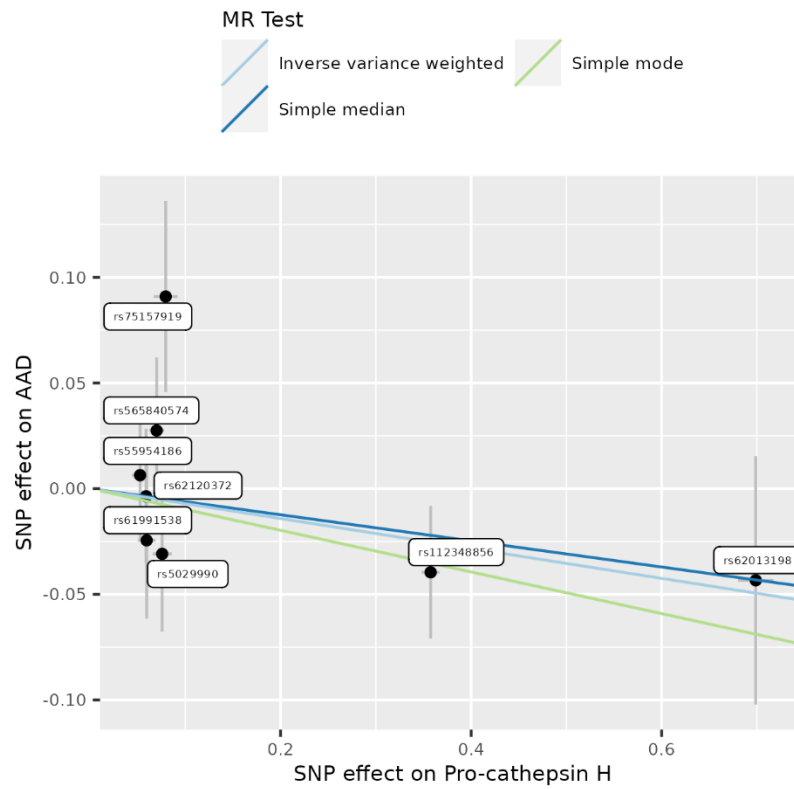

**Figure S9:** MR plot including scatter plot of the instrumental SNP effects on Pro-cathepsin H levels (exposure) vs. C-peptide (outcome). The straight lines correspond to MR fits for each of the methods used.

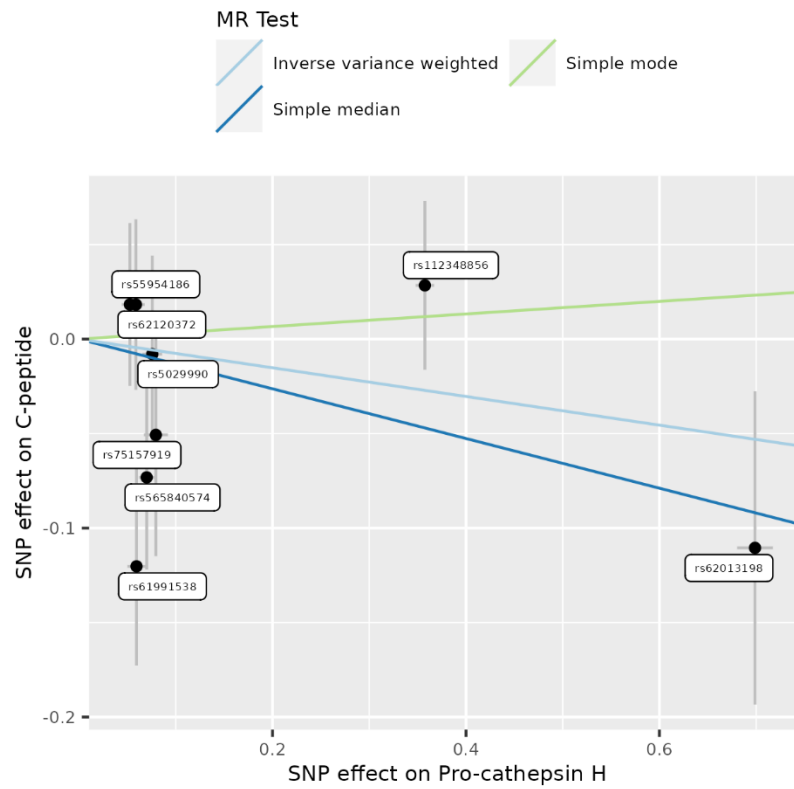

## References

1. Livingstone SJ, Levin D, Looker HC, Lindsay RS, Wild SH, Joss N, Leese G, Leslie P, McCrimmon RJ, Metcalfe W, McKnight JA, Morris AD, Pearson DW, Petrie JR, Philip S, Sattar NA, Traynor JP, Colhoun HM, Scottish Diabetes Research Network epidemiology g, Scottish Renal R: Estimated life expectancy in a Scottish cohort with type 1 diabetes, 2008-2010. *JAMA* 2015;313:37-44
2. McKeigue PM, Spiliopoulou A, McGurnaghan S, Colombo M, Blackbourn L, McDonald TJ, Onengut-Gomuscu S, Rich SS, A Palmer CN, McKnight JA, J Strachan MW, Patrick AW, Chalmers J, Lindsay RS, Petrie JR, Thekkepat S, Collier A, MacRury S, Colhoun HM: Persistent C-peptide secretion in Type 1 diabetes and its relationship to the genetic architecture of diabetes. *BMC medicine* 2019;17:165
3. Effects of age, duration and treatment of insulin-dependent diabetes mellitus on residual beta-cell function: observations during eligibility testing for the Diabetes Control and Complications Trial (DCCT). The DCCT Research Group. *J Clin Endocrinol Metab* 1987;65:30-36
4. Effect of intensive therapy on residual beta-cell function in patients with type 1 diabetes in the diabetes control and complications trial. A randomized, controlled trial. The Diabetes Control and Complications Trial Research Group. *Ann Intern Med* 1998;128:517-523
5. Dabelea D, Kinney G, Snell-Bergeon JK, Hokanson JE, Eckel RH, Ehrlich J, Garg S, Hamman RF, Rewers M: Effect of type 1 diabetes on the gender difference in coronary artery calcification: a role for insulin resistance? The Coronary Artery Calcification in Type 1 Diabetes (CACTI) Study. *Diabetes* 2003;52:2833-2839
6. Garg SK, Moser EG, Bode BW, Klaff LJ, Hiatt WR, Beatson C, Snell-Bergeon JK: Effect of sitagliptin on post-prandial glucagon and GLP-1 levels in patients with type 1 diabetes: investigator-initiated, double-blind, randomized, placebo-controlled trial. *Endocr Pract* 2013;19:19-28
7. Klein R, Klein BE, Moss SE: The Wisconsin Epidemiologic Study of Diabetic Retinopathy. XVI. The relationship of C-peptide to the incidence and progression of diabetic retinopathy. *Diabetes* 1995;44:796-801
8. Costacou T, Secrest AM, Ferrell RE, Orchard TJ: Haptoglobin genotype and cerebrovascular disease incidence in type 1 diabetes. *Diab Vasc Dis Res* 2014;11:335-342
9. Smith BH, Campbell H, Blackwood D, Connell J, Connor M, Deary IJ, Dominiczak AF, Fitzpatrick B, Ford I, Jackson C, Haddow G, Kerr S, Lindsay R, McGilchrist M, Morton R, Murray G, Palmer CN, Pell JP, Ralston SH, St Clair D, Sullivan F, Watt G, Wolf R, Wright A, Porteous D, Morris AD: Generation Scotland: the Scottish Family Health Study; a new resource for researching genes and heritability. *BMC Med Genet* 2006;7:74
10. McKeigue PM, Spiliopoulou A, McGurnaghan S, Colombo M, Blackbourn L, McDonald TJ, Onengut-Gomuscu S, Rich SS, CN AP, McKnight JA, MW JS, Patrick AW, Chalmers J, Lindsay RS, Petrie JR, Thekkepat S, Collier A, MacRury S, Colhoun HM: Persistent C-peptide secretion in Type 1 diabetes and its relationship to the genetic architecture of diabetes. *BMC Med* 2019;17:165
11. Roshandel D, Gubitosi-Klug R, Bull SB, Canty AJ, Pezzolesi MG, King GL, Keenan HA, Snell-Bergeon JK, Maahs DM, Klein R, Klein BEK, Orchard TJ, Costacou T, Weedon MN, Group DER, Oram RA, Paterson AD: Meta-genome-wide association studies identify a locus on chromosome 1 and multiple variants in the MHC region for serum C-peptide in type 1 diabetes. *Diabetologia* 2018;2018 May;61(5):1098-1111:<https://link.springer.com/article/10.1007%1002Fs00125-00018-04555-00129>
12. Robertson CC, Inshaw JRJ, Onengut-Gomuscu S, Chen WM, Santa Cruz DF, Yang H, Cutler AJ, Crouch DJM, Farber E, Bridges SL, Jr., Edberg JC, Kimberly RP, Buckner JH, Deloukas P, Divers J, Dabelea D, Lawrence JM, Marcovina S, Shah AS, Greenbaum CJ, Atkinson MA, Gregersen PK, Oksenberg JR, Pociot F, Rewers MJ, Steck AK, Dunger DB, Type 1 Diabetes Genetics C, Wicker LS, Concannon P, Todd JA, Rich SS: Fine-mapping, trans-ancestral and genomic analyses identify causal variants, cells, genes and drug targets for type 1 diabetes. *Nat Genet* 2021;53:962-971
13. Onengut-Gomuscu S, Chen WM, Burren O, Cooper NJ, Quinlan AR, Mychaleckyj JC, Farber E, Bonnie JK, Szpak M, Schofield E, Achuthan P, Guo H, Fortune MD, Stevens H, Walker NM, Ward LD, Kundaje A, Kellis M, Daly MJ, Barrett JC: Fine mapping of type 1 diabetes susceptibility loci and evidence for colocalization of causal variants with lymphoid gene enhancers. 2015;47:381-386
14. Ferkingstad E, Sulem P, Atlason BA, Sveinbjornsson G, Magnusson MI, Styrmisdottir EL, Gunnarsdottir K, Helgason A, Oddsson A, Halldorsson BV, Jensson BO, Zink F, Halldorsson GH, Masson G, Arnadottir GA, Katrinardottir H, Juliusson K, Magnusson MK, Magnusson OT, Fridriksdottir R, Saevarsdottir S, Gudjonsson SA, Stacey SN, Rognvaldsson S, Eiriksdottir T, Olafsdottir TA, Steinthorsdottir V, Tragante V,

Ulfarsson MO, Stefansson H, Jonsdottir I, Holm H, Rafnar T, Melsted P, Saemundsdottir J, Norddahl GL, Lund SH, Gudbjartsson DF, Thorsteinsdottir U, Stefansson K: Large-scale integration of the plasma proteome with genetics and disease. *Nat Genet* 2021;53:1712-1721
